# Supplementary material for: Genome-wide association study for age-related hearing loss in CFW mice
Source: PubMed Central journal article supplement (PMC11195089; doi:10.1101/2024.06.10.598304), 2024-06-10
Supplement: NIHPP2024.06.10.598304v1-supplement-1.pdf [file NIHPP2024.06.10.598304v1-supplement-1.pdf]

## Supplemental materials:

1. The Genetic Analysis Report

[https://palmerlab.s3.sdsc.edu/tsanches\\_dash\\_genotypes/gwas\\_results/r01\\_friedman\\_arhl\\_2020/results/gwas\\_report.html](https://palmerlab.s3.sdsc.edu/tsanches_dash_genotypes/gwas_results/r01_friedman_arhl_2020/results/gwas_report.html)

2. Supplemental Figure 1.

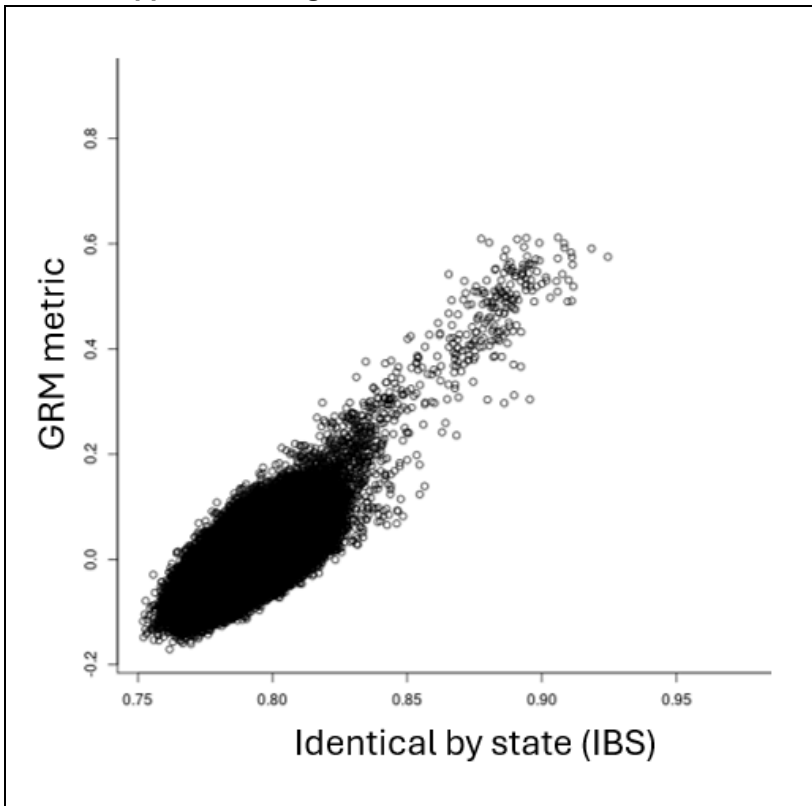

**Supplemental Figure 1.** Scatterplot of relatedness expressed as Identical By State (IBS) score and GRM metric shows that there is a group of pairs with high relatedness. There are 252 unique mice in the group that have IBS >0.87 and GRM >0.35, most likely siblings or close cousins.
